# Supplementary material for: Histone benzoylation serves as an epigenetic mark for DPF and YEATS family proteins
Source: PubMed Central journal article supplement — Nucleic Acids Res. 2020 Dec 8;49(1):114–26. doi: 10.1093/nar/gkaa1130 (PMC7797077; doi:10.1093/nar/gkaa1130), 2020-12-08
Supplement: gkaa1130_supplemental_file.pdf [file gkaa1130_supplemental_file.pdf]

---

## SUPPLEMENTARY DATA

# Histone Benzoylation Serves as an Epigenetic Mark for DPF and YEATS Family Proteins

Xiangle Ren<sup>1</sup>, Yang Zhou<sup>1</sup>, Zhaoyu Xue<sup>2</sup>, Ning Hao<sup>1</sup>, Yuanyuan Li<sup>1</sup>, Xiaohuan Guo<sup>1</sup>, Daliang Wang<sup>1</sup>, Xiaobing Shi<sup>2</sup> and Haitao Li<sup>1,3,\*</sup>

<sup>1</sup> MOE Key Laboratory of Protein Sciences, Beijing Advanced Innovation Center for Structural Biology, Beijing Frontier Research Center for Biological Structure, Department of Basic Medical Sciences, School of Medicine, Tsinghua University, Beijing 100084, China

<sup>2</sup> Center for Epigenetics, Van Andel Institute, Grand Rapids, MI 49503, USA

<sup>3</sup> Tsinghua-Peking Center for Life Sciences, Beijing 100084, China

\* To whom correspondence should be addressed: [lht@tsinghua.edu.cn](mailto:lht@tsinghua.edu.cn)

---

## Supplementary Tables S1-S3

**Supplementary Table S1. List of peptides used in this study.**

| Peptides                  | Sequence                                                |
|---------------------------|---------------------------------------------------------|
| H3 <sub>2-16</sub> K9bz   | ac-RTKQTAR <b>Kbz</b> STGGKAP-NH <sub>2</sub>           |
| H3 <sub>2-16</sub> un     | ac-RTKQTARKSTGGKAP-NH <sub>2</sub>                      |
| H3 <sub>2-16</sub> K9ac   | ac-RTKQTAR <b>Kac</b> STGGKAP-NH <sub>2</sub>           |
| H3 <sub>2-16</sub> K9cr   | ac-RTKQTAR <b>Kcr</b> STGGKAP-NH <sub>2</sub>           |
| H3 <sub>1-25</sub> K14bz  | ARTKQTARKSTGG <b>Kbz</b> APRKQLATKAA-NH <sub>2</sub>    |
| H3 <sub>1-25</sub> un     | ARTKQTARKSTGGKAPRKQLATKAA-NH <sub>2</sub>               |
| H3 <sub>1-25</sub> K14ac  | ARTKQTARKSTGG <b>Kac</b> APRKQLATKAA-NH <sub>2</sub>    |
| H3 <sub>1-25</sub> K14cr  | ARTKQTARKSTGG <b>Kcr</b> APRKQLATKAA-NH <sub>2</sub>    |
| H3 <sub>1-25</sub> K18bz  | ARTKQTARKSTGGKAPR <b>Kbz</b> QLATKAA-NH <sub>2</sub>    |
| H3 <sub>1-25</sub> K18ac  | ARTKQTARKSTGGKAPR <b>Kac</b> QLATKAA-NH <sub>2</sub>    |
| H3 <sub>1-25</sub> K18cr  | ARTKQTARKSTGGKAPR <b>Kcr</b> QLATKAA-NH <sub>2</sub>    |
| H3 <sub>15-39</sub> K27bz | ac-APRKQLATKAAR <b>Kbz</b> SAPATGGVKKPH-NH <sub>2</sub> |
| H3 <sub>24-31</sub> K27bz | ac-AAR <b>Kbz</b> SAPA-NH <sub>2</sub>                  |
| H3 <sub>15-39</sub> un    | ac-APRKQLATKAARKSAPATGGVKKPH-NH <sub>2</sub>            |
| H3 <sub>15-39</sub> K27ac | ac-APRKQLATKAAR <b>Kac</b> SAPATGGVKKPH-NH <sub>2</sub> |
| H3 <sub>15-39</sub> K27cr | ac-APRKQLATKAAR <b>Kcr</b> SAPATGGVKKPH-NH <sub>2</sub> |

**Supplementary Table S2. Thermodynamic parameters of representative ITC titrations.**

| Protein                 | Peptide                   | $\Delta H(\text{cal/mol})$ | $-T\Delta S(\text{cal/mol})$ | $K_a (\text{M}^{-1})$ | N               | Chi2/DoF |
|-------------------------|---------------------------|----------------------------|------------------------------|-----------------------|-----------------|----------|
| AF9 <sub>YEATS</sub>    | H3 <sub>2-16</sub> K9bz   | -1.750E4 ± 124.4           | 10603.92                     | 1.69E5 ± 6.12E3       | 0.872 ± 0.00464 | 8765     |
|                         | H3 <sub>2-16</sub> un     | N.D.                       |                              |                       |                 |          |
|                         | H3 <sub>2-16</sub> K9ac   | -1.784E4 ± 144.5           | 10747.995                    | 2.37E5 ± 1.20E4       | 0.929 ± 0.00563 | 1.85E4   |
|                         | H3 <sub>2-16</sub> K9cr   | -1.750E4 ± 109.0           | 9998.805                     | 4.94E5 ± 2.74E4       | 0.995 ± 0.00451 | 1.988E4  |
| ENL <sub>YEATS</sub>    | H3 <sub>15-39</sub> K27bz | -6378 ± 103.0              | 829.872                      | 1.61E4 ± 715          | 0.920 ± 0       | 1675     |
|                         | H3 <sub>15-39</sub> un    | N.D.                       |                              |                       |                 |          |
|                         | H3 <sub>15-39</sub> K27ac | -5380 ± 209.3              | 128.5149                     | 9.60E3 ± 837          | 0.910 ± 0       | 3257     |
|                         | H3 <sub>15-39</sub> K27cr | -6990 ± 69.95              | 1138.1925                    | 2.74E4 ± 950          | 0.930 ± 0       | 1556     |
| GAS41 <sub>YEATS</sub>  | H3 <sub>15-39</sub> K27bz | -5584 ± 719.7              | 102.2933                     | 1.43E4 ± 2.06E3       | 0.984 ± 0.0936  | 2175     |
|                         | H3 <sub>15-39</sub> un    | N.D.                       |                              |                       |                 |          |
|                         | H3 <sub>15-39</sub> K27ac | -9151 ± 355.1              | 3284.91                      | 2.84E4 ± 1.93E3       | 0.973 ± 0.0272  | 3745     |
|                         | H3 <sub>15-39</sub> K27cr | -9556 ± 97.90              | 3140.835                     | 7.21E4 ± 2.41E3       | 1.02 ± 0.00757  | 2180     |
| YEATS2 <sub>YEATS</sub> | H3 <sub>15-39</sub> K27bz | -1.078E4 ± 376.3           | 4668.03                      | 4.17E4 ± 3.67E3       | 1.02 ± 0.0257   | 1.486E4  |
|                         | H3 <sub>15-39</sub> un    | N.D.                       |                              |                       |                 |          |
|                         | H3 <sub>15-39</sub> K27ac | -6706 ± 120.4              | 1593.47                      | 7.53E3 ± 273          | 0.950 ± 0       | 846.4    |
|                         | H3 <sub>15-39</sub> K27cr | -1.075E4 ± 346.4           | 4927.365                     | 2.53E4 ± 1.49E3       | 1.02 ± 0.0237   | 4184     |
| MOZ <sub>DPF</sub>      | H3 <sub>1-25</sub> K14bz  | -5022 ± 33.52              | -1806.789                    | 1.01E5 ± 3.46E3       | 1.09 ± 0.00518  | 932.8    |
|                         | H3 <sub>1-25</sub> un     | -1741 ± 118.4              | -4174.1                      | 2.14E4 ± 3.35E3       | 1.14 ± 0.0458   | 690.5    |
|                         | H3 <sub>1-25</sub> K14ac  | -3349 ± 56.15              | -3577.8                      | 1.17E5 ± 1.05E4       | 1.05 ± 0.0127   | 2884     |
|                         | H3 <sub>1-25</sub> K14cr  | -6014 ± 33.17              | -1293.971                    | 2.28E5 ± 8.55E3       | 0.937 ± 0.00382 | 1578     |
| MORF <sub>DPF</sub>     | H3 <sub>1-25</sub> K14bz  | -8596 ± 56.54              | 1693.492                     | 1.14E5 ± 3.86E3       | 1.00 ± 0.00486  | 2453     |
|                         | H3 <sub>1-25</sub> un     | -7084 ± 102.0              | 1189.6185                    | 2.08E4 ± 533          | 0.916 ± 0.00918 | 299.4    |
|                         | H3 <sub>1-25</sub> K14ac  | -7093 ± 39.26              | 527.7255                     | 6.45E4 ± 1.26E3       | 0.905 ± 0.00362 | 445.3    |
|                         | H3 <sub>1-25</sub> K14cr  | -1.076E4 ± 26.21           | 3607.615                     | 1.77E5 ± 2.45E3       | 0.819 ± 0.00149 | 561.4    |
| DPF1 <sub>DPF</sub>     | H3 <sub>1-25</sub> K14bz  | -5154 ± 43.62              | -3458.54                     | 2.06E6 ± 2.93E5       | 1.05 ± 0.00549  | 1.059E4  |
|                         | H3 <sub>1-25</sub> un     | -303.0 ± 14.75             | -7215.23                     | 3.30E5 ± 1.45E5       | 1.14 ± 0.0403   | 643.7    |
|                         | H3 <sub>1-25</sub> K14ac  | -3890 ± 39.23              | -4531.88                     | 1.46E6 ± 2.22E5       | 1.11 ± 0.00726  | 8502     |
|                         | H3 <sub>1-25</sub> K14cr  | -9422 ± 35.06              | 123.7323                     | 6.54E6 ± 6.48E5       | 1.04 ± 0.00203  | 8158     |
| DPF2 <sub>DPF</sub>     | H3 <sub>1-25</sub> K14bz  | -5417 ± 19.43              | -3607.615                    | 4.10E6 ± 2.87E5       | 0.957 ± 0.00204 | 1731     |
|                         | H3 <sub>1-25</sub> un     | -937.3 ± 60.8              | -6618.93                     | 3.43E5 ± 1.89E5       | 1.12 ± 0.0534   | 8625     |
|                         | H3 <sub>1-25</sub> K14ac  | -4958 ± 19                 | -4144.285                    | 4.61E6 ± 3.60E5       | 0.937 ± 0.00213 | 1664     |
|                         | H3 <sub>1-25</sub> K14cr  | -8764 ± 36.5               | -998.8025                    | 1.43E7 ± 2.02E6       | 0.924 ± 0.00212 | 6956     |
| DPF3 <sub>DPF</sub>     | H3 <sub>1-25</sub> K14bz  | -4540 ± 30.00              | -4233.73                     | 2.65E6 ± 3.09E5       | 0.979 ± 0.00395 | 4435     |
|                         | H3 <sub>1-25</sub> un     | -368.6 ± 31.82             | -6917.08                     | 2.23E5 ± 1.72E5       | 1.45 ± 0.0897   | 2902     |
|                         | H3 <sub>1-25</sub> K14ac  | -5725 ± 24.56              | -3160.39                     | 3.25E6 ± 2.66E5       | 0.966 ± 0.00248 | 3055     |
|                         | H3 <sub>1-25</sub> K14cr  | -8097 ± 24.42              | -1419.19                     | 9.44E6 ± 8.42E5       | 0.885 ± 0.00140 | 3043     |
| PHF10 <sub>DPF</sub>    | H3 <sub>1-25</sub> K14bz  | -4083 ± 31.05              | -4263.545                    | 1.33E6 ± 1.22E5       | 1.05 ± 0.00543  | 2377     |
|                         | H3 <sub>1-25</sub> un     | -1547 ± 65.44              | -5933.185                    | 3.08E5 ± 8.30E4       | 1.02 ± 0.0319   | 4254     |
|                         | H3 <sub>1-25</sub> K14ac  | -4894 ± 49.72              | -3041.13                     | 6.53E5 ± 5.89E4       | 1.02 ± 0.00748  | 4171     |
|                         | H3 <sub>1-25</sub> K14cr  | -6149 ± 40.71              | -2352.4                      | 1.69E6 ± 1.38E5       | 0.904 ± 0.00406 | 3618     |
| BRD3 <sub>BRD2</sub>    | H3 <sub>1-25</sub> K18bz  |                            |                              | N.D.                  |                 |          |
|                         | H3 <sub>1-25</sub> un     |                            |                              | N.D.                  |                 |          |
|                         | H3 <sub>1-25</sub> K18ac  | -8530 ± 295.7              | 3190.205                     | 8.25E3 ± 421          | 1.04 ± 0.0245   | 973.9    |
|                         | H3 <sub>1-25</sub> K18cr  |                            |                              | N.D.                  |                 |          |
| BRD9 <sub>BRD</sub>     | H3 <sub>15-39</sub> K27bz |                            |                              | N.D.                  |                 |          |
|                         | H3 <sub>15-39</sub> un    |                            |                              | N.D.                  |                 |          |
|                         | H3 <sub>15-39</sub> K27ac | -2611 ± 66.11              | -2197.37                     | 3.35E3 ± 163          | 1.02 ± 0        | 172      |
|                         | H3 <sub>15-39</sub> K27cr |                            |                              | N.D.                  |                 |          |

*Continued*

| Protein                       | Peptide                   | $\Delta H(\text{cal/mol})$ | $-T\Delta S(\text{cal/mol})$ | $K_a (\text{M}^{-1})$ | N               | Chi2/DoF |
|-------------------------------|---------------------------|----------------------------|------------------------------|-----------------------|-----------------|----------|
| MOZ <sub>DPF</sub> L242I      | H3 <sub>1-25</sub> K14bz  | -8334 ± 48.52              | 1019.673                     | 2.29E5 ± 6.50E3       | 0.974 ± 0.00420 | 1251     |
|                               | H3 <sub>1-25</sub> K14ac  | -3751 ± 120.7              | -2644.5905                   | 4.87E4 ± 3.03E3       | 0.976 ± 0.0232  | 638.5    |
|                               | H3 <sub>1-25</sub> K14cr  | -8181 ± 133.9              | 1067.377                     | 1.63E5 ± 9.87E3       | 0.843 ± 0.0102  | 4517     |
| MOZ <sub>DPF</sub> N235S      | H3 <sub>1-25</sub> K14bz  | -4875 ± 56.05              | -2006.5495                   | 1.10E5 ± 6.30E3       | 1.00 ± 0.00840  | 2223     |
|                               | H3 <sub>1-25</sub> K14ac  | -2785 ± 32.89              | -4352.99                     | 1.73E5 ± 1.24E4       | 0.972 ± 0.00849 | 1154     |
|                               | H3 <sub>1-25</sub> K14cr  | -5852 ± 41.72              | -1520.565                    | 2.53E5 ± 1.24E4       | 0.876 ± 0.00461 | 2114     |
| AF9 <sub>YEATS</sub> F28S     | H3 <sub>2-16</sub> K9bz   | -1.625E4 ± 187.5           | 9047.91                      | 2.85E5 ± 1.97E4       | 0.825 ± 0.00711 | 2.242E4  |
| YEATS2 <sub>YEATS</sub> S230F | H3 <sub>15-39</sub> K27bz | -6762 ± 243.8              | 795.294                      | 3.34E4 ± 2.65E3       | 1.03 ± 0.0266   | 4022     |
| YEATS2 <sub>YEATS</sub> S230F | H3 <sub>15-39</sub> K27ac | -7015 ± 401.8              | 1518.5505                    | 1.47E4 ± 1.13E3       | 1.08 ± 0.0444   | 1483     |
| YEATS2 <sub>YEATS</sub> S230F | H3 <sub>15-39</sub> K27cr | -9051 ± 194.6              | 2694.2025                    | 6.61E4 ± 4.31E        | 0.892 ± 0.0142  | 6494     |
| YEATS2 <sub>YEATS</sub> W282A | H3 <sub>15-39</sub> K27bz |                            |                              | N.D.                  |                 |          |
| YEATS2 <sub>YEATS</sub> Y262A |                           |                            |                              |                       | N.D.            |          |

**Supplementary Table S3. Summary of  $K_D$  values from independent ITC titrations and their statistical analyses.**

| Protein            | YEATS <sub>2YEATS</sub>  |         |         | YEATS <sub>2YEATS</sub> S230F |         |         | GAS41 <sub>YEATS</sub> |         |         |
|--------------------|--------------------------|---------|---------|-------------------------------|---------|---------|------------------------|---------|---------|
| Peptide            | H3K27bz                  | H3K27cr | H3K27ac | H3K27bz                       | H3K27cr | H3K27ac | H3K27bz                | H3K27cr | H3K27ac |
| $K_D$ (individual) | 23.98                    | 39.53   | 132.80  | 29.94                         | 15.13   | 68.03   | 69.93                  | 13.87   | 35.21   |
|                    | 20.24                    | 36.50   | 129.53  | 29.67                         | 13.55   | 74.63   | 50.00                  | 10.71   | 27.93   |
|                    | 20.49                    | 36.10   | 131.06  |                               |         |         | 68.96                  | 10.08   | 32.47   |
| $K_D$ (mean)       | 21.57                    | 37.38   | 131.13  | 29.81                         | 14.34   | 71.33   | 62.96                  | 11.55   | 31.87   |
| SD                 | 2.09                     | 1.88    | 1.64    | 0.19                          | 1.12    | 4.67    | 11.24                  | 2.03    | 3.68    |
| Protein            | AF9 <sub>YEATS</sub>     |         |         | AF9 <sub>YEATS</sub> F28S     |         |         | ENL <sub>YEATS</sub>   |         |         |
| Peptide            | H3K9bz                   | H3K9cr  | H3K9ac  | H3K9bz                        |         |         | H3K27bz                | H3K27cr | H3K27ac |
| $K_D$ (individual) | 5.92                     | 2.02    | 4.22    | 3.51                          |         |         | 62.11                  | 36.50   | 104.17  |
|                    | 6.02                     | 2.42    | 4.12    | 3.83                          |         |         | 62.50                  | 29.15   | 80.60   |
|                    | 6.02                     | 2.35    | 4.57    | 4.00                          |         |         | 69.44                  | 28.01   | 109.17  |
|                    | 5.92                     |         |         | 3.85                          |         |         |                        |         |         |
| $K_D$ (mean)       | 5.97                     | 2.26    | 4.30    | 3.80                          |         |         | 64.68                  | 31.22   | 97.98   |
| SD                 | 0.06                     | 0.21    | 0.24    | 0.21                          |         |         | 4.12                   | 4.61    | 15.26   |
| Protein            | MOZ <sub>DPF</sub>       |         |         | MORF <sub>DPF</sub>           |         |         | PHF10 <sub>DPF</sub>   |         |         |
| Peptide            | H3K14bz                  | H3K14cr | H3K14ac | H3K14bz                       | H3K14cr | H3K14ac | H3K14bz                | H3K14cr | H3K14ac |
| $K_D$ (individual) | 9.90                     | 4.39    | 8.55    | 8.77                          | 5.65    | 15.50   | 0.75                   | 0.59    | 1.53    |
|                    | 10.52                    | 4.67    | 8.47    | 8.93                          | 5.56    | 16.08   | 0.76                   | 0.52    | 1.50    |
|                    | 10.34                    | 4.50    | 8.20    | 7.58                          | 5.24    | 18.48   |                        |         |         |
|                    |                          |         | 8.40    |                               |         |         |                        |         |         |
| $K_D$ (mean)       | 10.25                    | 4.52    | 8.41    | 8.43                          | 5.48    | 16.69   | 0.76                   | 0.56    | 1.52    |
| SD                 | 0.32                     | 0.14    | 0.15    | 0.74                          | 0.22    | 1.58    | 0.01                   | 0.05    | 0.02    |
| Protein            | DPF1 <sub>DPF</sub>      |         |         | DPF2 <sub>DPF</sub>           |         |         | DPF3 <sub>DPF</sub>    |         |         |
| Peptide            | H3K14bz                  | H3K14cr | H3K14ac | H3K14bz                       | H3K14cr | H3K14ac | H3K14bz                | H3K14cr | H3K14ac |
| $K_D$ (individual) | 0.49                     | 0.15    | 0.68    | 0.24                          | 0.070   | 0.22    | 0.38                   | 0.11    | 0.31    |
|                    | 0.87                     | 0.15    | 0.89    | 0.47                          | 0.066   | 0.38    | 0.49                   | 0.13    | 0.37    |
|                    | 0.64                     | 0.11    | 0.99    | 0.40                          | 0.084   | 0.32    | 0.47                   | 0.13    | 0.45    |
|                    | 0.55                     |         |         |                               |         |         |                        |         |         |
|                    | 0.64                     |         |         |                               |         |         |                        |         |         |
| $K_D$ (mean)       | 0.64                     | 0.14    | 0.85    | 0.37                          | 0.07    | 0.31    | 0.45                   | 0.12    | 0.38    |
| SD                 | 0.14                     | 0.02    | 0.16    | 0.12                          | 0.01    | 0.08    | 0.06                   | 0.01    | 0.07    |
| Protein            | MOZ <sub>DPF</sub> L242I |         |         | MOZ <sub>DPF</sub> N235S      |         |         |                        |         |         |
| Peptide            | H3K14bz                  | H3K14cr | H3K14ac | H3K14bz                       | H3K14cr | H3K14ac |                        |         |         |
| $K_D$ (individual) | 4.37                     | 6.13    | 20.53   | 9.09                          | 3.95    | 5.78    |                        |         |         |
|                    | 4.26                     | 5.85    | 26.39   | 9.17                          | 4.78    | 8.62    |                        |         |         |
| $K_D$ (mean)       | 4.32                     | 5.99    | 23.46   | 9.13                          | 4.37    | 7.20    |                        |         |         |
| SD                 | 0.08                     | 0.20    | 4.14    | 0.06                          | 0.59    | 2.01    |                        |         |         |

$K_D$  values in red are from representative ITC fitting curves. SD, standard deviation.

## Supplementary Figures S1-S8

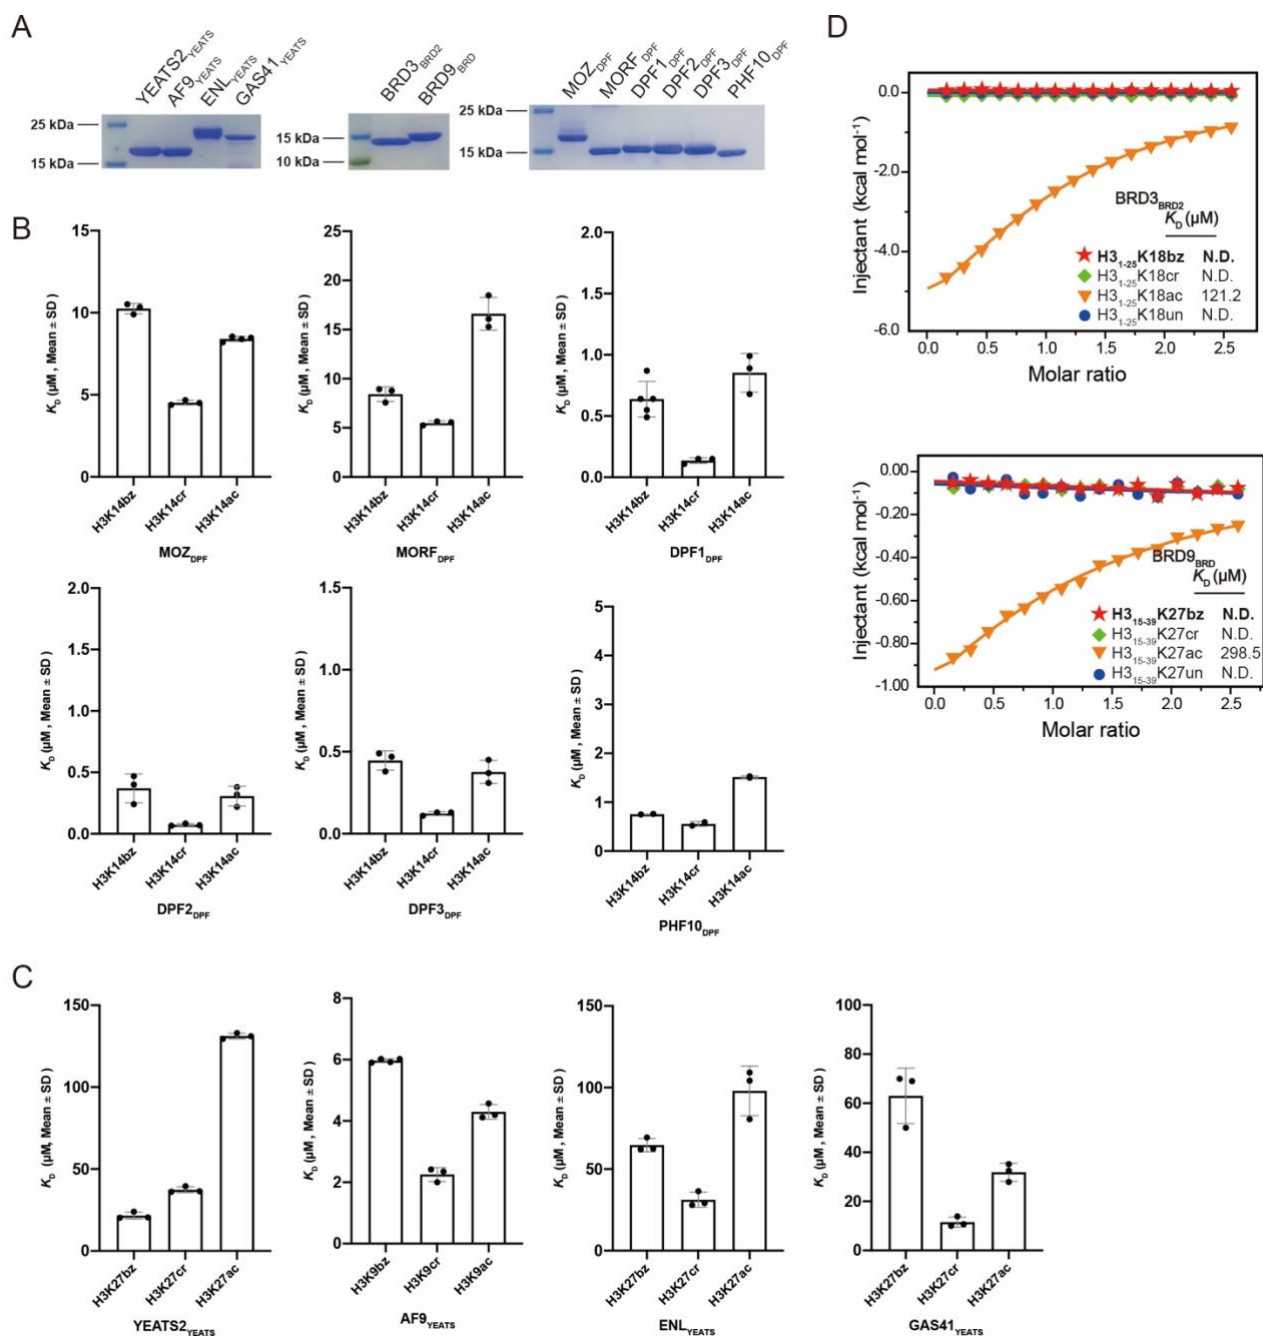

### Supplementary Figure S1. Recognition of histone benzoylation by acylation reader proteins.

(A) Coomassie blue staining of twelve purified human histone acylation readers. (B) Binding affinities of Kbz, Kcr and Kac titrated to DPF family members. Each black dot represents one ITC titration experiment. Error bar, standard deviation. (C) Binding affinities of Kbz, Kcr and Kac titrated to YEATS family members. (D) ITC fitting curves of the indicated histone peptides titrated into BRDs. N.D., not detectable.

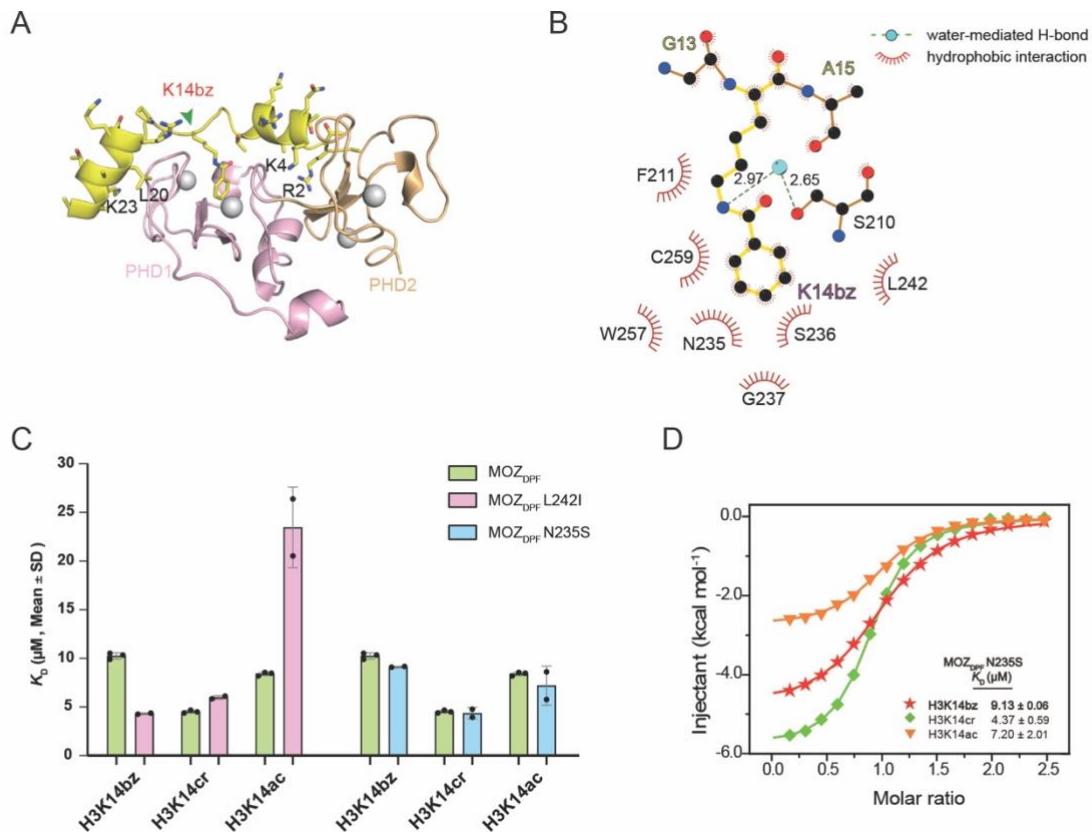

**Supplementary Figure S2. Molecular basis for H3K14bz binding by MOZ<sub>DPF</sub> and mutagenesis studies.** (A) Overall structure of MOZ<sub>DPF</sub> bound to H3<sub>1-25</sub>K14bz peptide. PHD1, PHD2, and histone peptide are colored pink, orange, and yellow, respectively. (B) LigPlot diagram listing critical interactions between K14bz and MOZ<sub>DPF</sub>. Black ball, carbon; Blue ball, nitrogen; Red ball, oxygen; Cyan ball, water; Dashes, hydrogen bond; Curved brushes, hydrophobic interaction. Hydrogen bond distances are labeled Angstroms. (C) Binding affinity comparison of MOZ<sub>DPF</sub> and its mutants in recognition of H3K14bz, H3K14cr and H3K14ac. (D) ITC fitting curves of the indicated histone peptides titrated into MOZ<sub>DPF</sub> N235S mutant. Mean  $K_D$  and standard deviation are shown (N = 2).

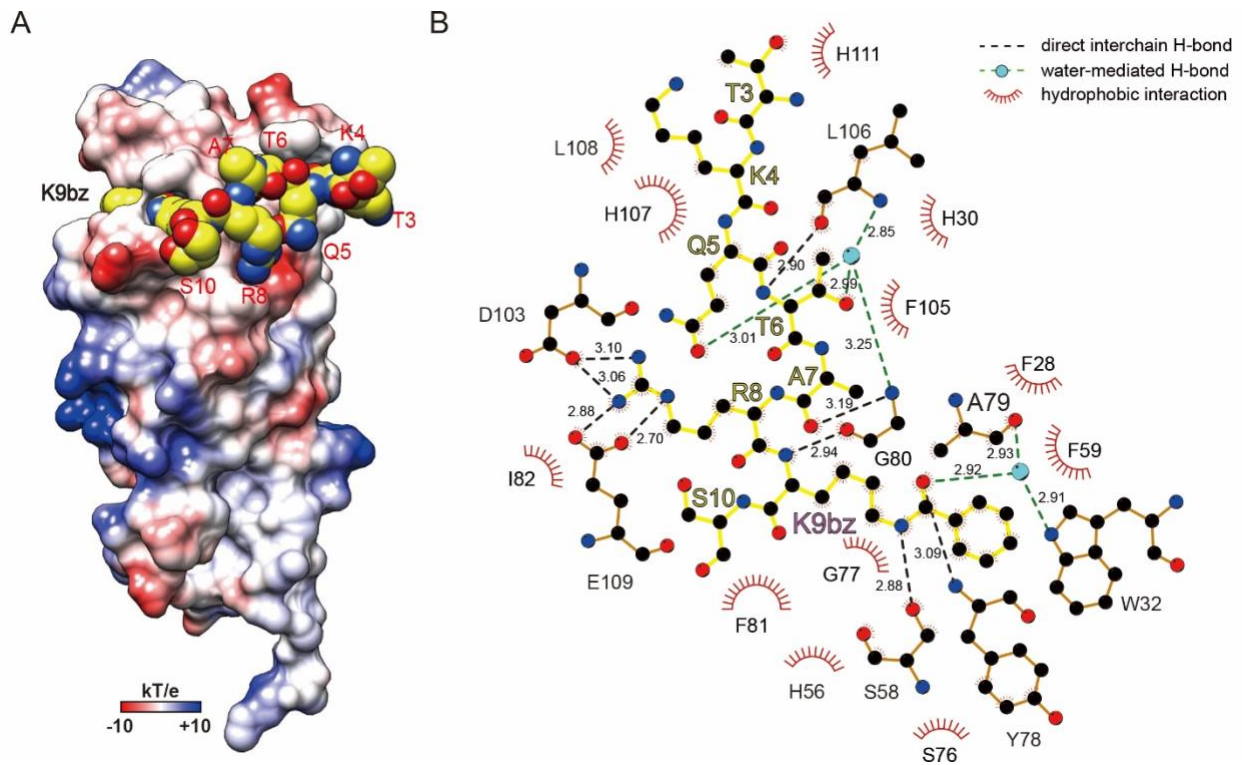

**Supplementary Figure S3. Recognition of H3K9bz by AF9<sub>YEATS</sub>.** (A) Overall structure of AF9<sub>YEATS</sub> bound to H3K9bz peptide. AF9<sub>YEATS</sub> is shown as electrostatic potential surface ranging from  $-10$  (red) to  $+10$  (blue) kT/e. H3K9bz is depicted in space-filling-surface view. (B) LigPlot diagram listing critical contacts between H3K9bz (yellow sticks) and AF9<sub>YEATS</sub> (orange sticks). Symbols are the same as described for Supplementary Figure S2B.



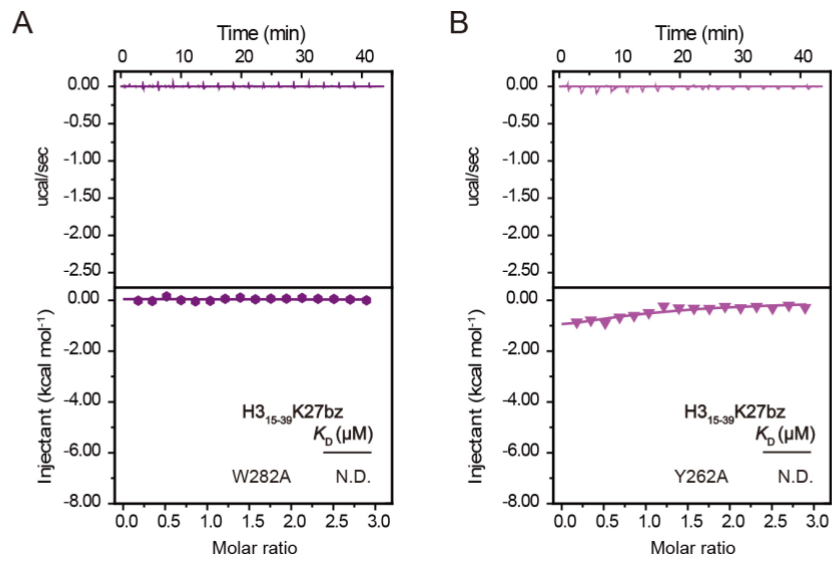

**Supplementary Figure S4. The importance of aromatic sandwiching residues of YEAST2 in H3K27bz recognition.** ITC fitting curves of H3K27bz peptide titrated into (A) W282A and (B) Y262A mutant YEAST2<sub>YEATS</sub>. N.D., not detectable.

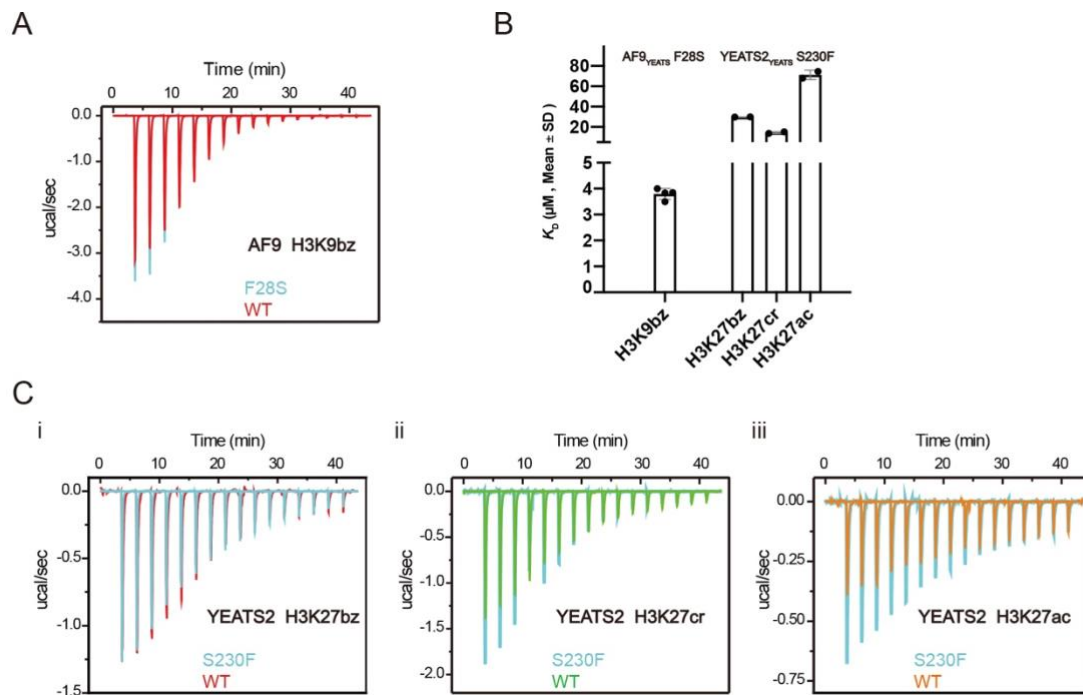

**Supplementary Figure S5. ITC binding curves on "tip-sensor" residue mutants.** (A) Binding curves of AF9<sup>YEATS</sup> and its F28S mutant titrated with H3K9bz peptide. (B) Binding affinities of indicated peptides titrated to AF9<sup>YEATS</sup> F28S and YEATS2<sup>YEATS</sup> S230F mutants. (C) Binding curves of YEATS2<sup>YEATS</sup> and its S230F mutant titrated with (i) H3K27bz, (ii) H3K27cr and (iii) H3K27ac peptides.

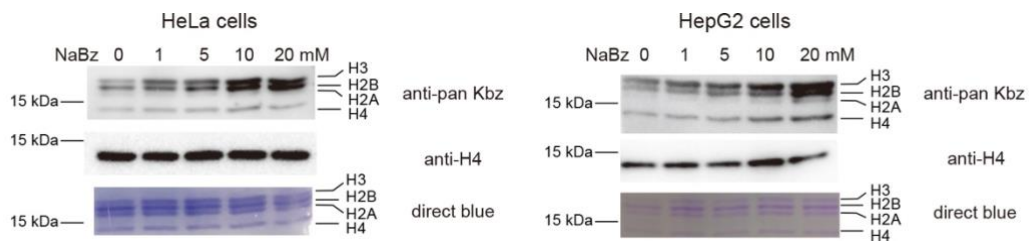

**Supplementary Figure S6. The inducible feature of histone benzoylation in HeLa and HepG2 cells.** Western blot analysis of core histone Kbz levels in response to the indicated concentrations of NaBz treatment in HeLa and HepG2 cells. Unmodified histone H4 was used as a loading control.



Related to Supplementary Figure S1A

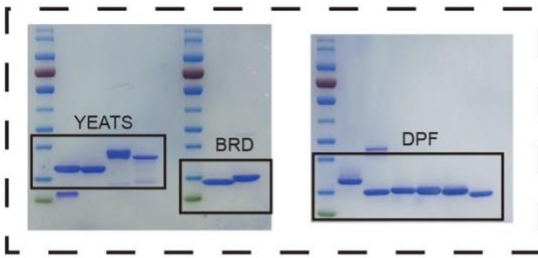

Related to Figure 6A and Supplementary Figure S6

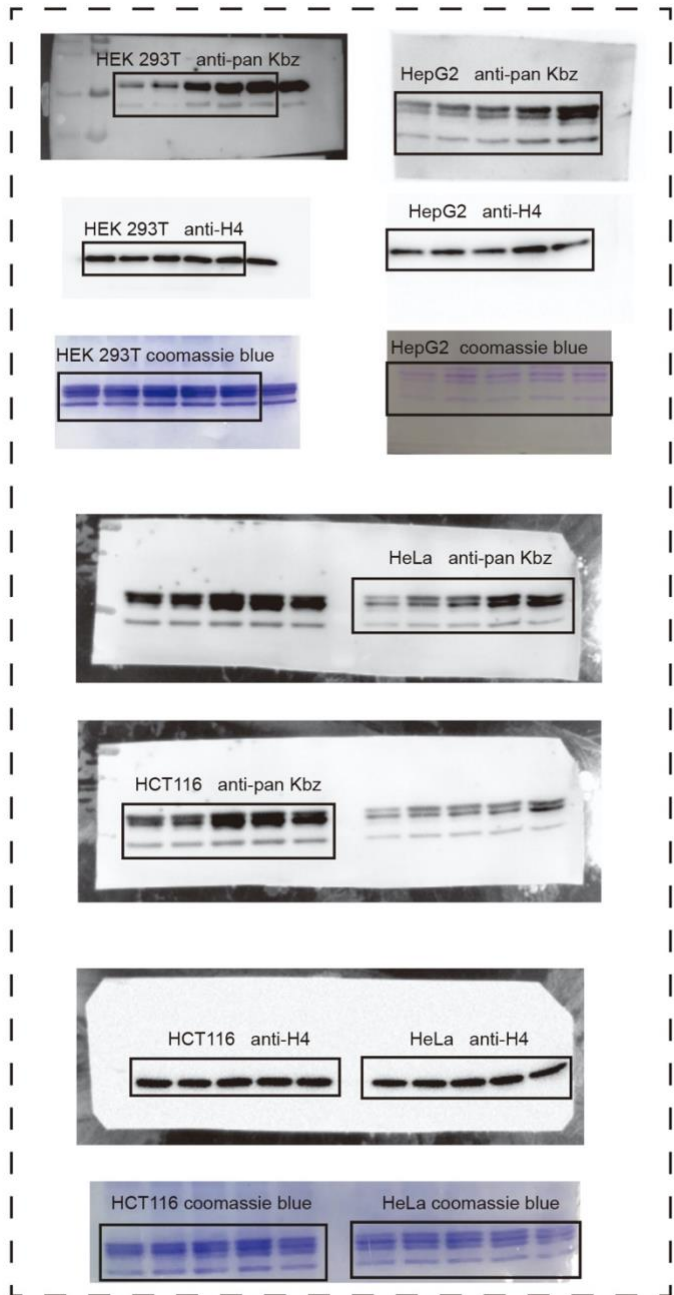

Related to Figure 6C

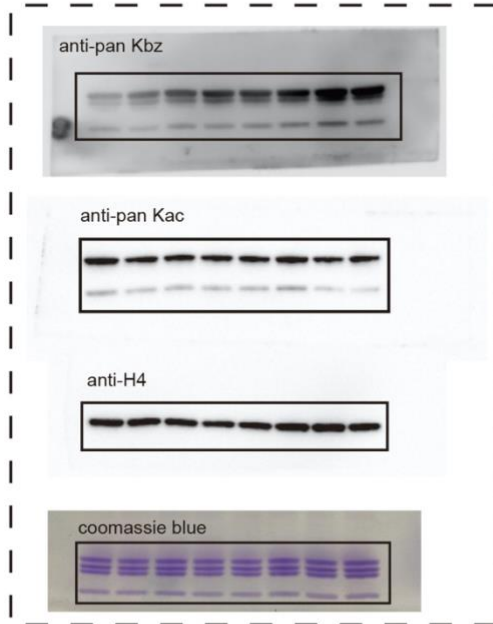

Supplementary Figure S8. Uncropped figures.
